# Supplementary material for: Bacterial interspecies interactions modulate pH-mediated antibiotic tolerance
Source: eLife journal article supplement (doi:10.7554/elife.51493), 2020-01-29
Supplement: supp [file elife-51493-supp-v1.zip]

Archive with 11 entries (11 files):
- elife_poa_e51493_Transparent_Reporting_File.pdf
- elife_poa_e51493_Figure_2_figure_supplement_4.pdf
- elife_poa_e51493_Figure_1_figure_supplement_1.pdf
- elife_poa_e51493_Figure_1_figure_supplement_2.pdf
- elife_poa_e51493_Figure_4_figure_supplement_1.pdf
- elife_poa_e51493_Figure_3_figure_supplement_1.pdf
- elife_poa_e51493_Figure_2_figure_supplement_1.pdf
- elife_poa_e51493_Figure_2_figure_supplement_3.pdf
- elife_poa_e51493_Figure_4_figure_supplement_2.pdf
- elife_poa_e51493_Figure_2_figure_supplement_2.pdf
- elife_poa_e51493_Supplementary_file_1.xlsx
