# Supplementary material for: Bacterial interspecies interactions modulate pH-mediated antibiotic tolerance
Source: eLife journal article supplement (doi:10.7554/elife.51493), 2020-01-29
Supplement: supp [file elife-51493-supp-v1.zip › elife_poa_e51493_Supplementary_file_1.xlsx]

## Sheet: Supplementary File 1a
Strains used in this study
Strain	Description	Colony aspect	Ref.
KC1199	Lactobacillus plantarum (WF) wild fly (D. melanogaster) isolate	MRS: opaque white to pale yellow, circular, large, smooth surface, umbonate, smooth to irregular edge	(Obadia et al., 2017)
		MYPL: opaque white, circular, small, smooth surface, raised, smooth edge
KC1200	Lactobacillus brevis lab fly (Oregon-R) isolate	MRS: opaque white, circular, medium size, raised, smooth edge	(Obadia et al., 2017)
		MYPL: opaque white, circular, small, raised, smooth edge.
KC1201	Acetobacter pasteurianus lab fly (Oregon-R) isolate	MRS: opaque beige, circular, medium size, mucoid, raised, smooth edge	(Gould et al., 2018)
		MYPL: opaque beige, circular, large, mucoid, raised, smooth edge
KC1202	Acetobacter tropicalis lab fly (Oregon-R) isolate	MRS: opaque beige, circular, medium size, mucoid, raised, smooth edge	(Gould et al., 2018)
		MYPL: opaque beige, circular, large, mucoid, raised, smooth edge
KC1203	Acetobacter orientalis lab fly (Oregon-R) isolate	MRS: opaque beige, irregular, medium to large size, dry, flat to irregular surface, smooth to lobate edge	(Obadia et al., 2017)
		MYPL: opaque beige, irregular, medium to large size, dry, flat to irregular surface, smooth to lobate edge
KC1204	Acetobacter indonesiensis lab fly isolate	MRS: opaque beige, circular, medium size, mucoid, raised, smooth edge	(Obadia et al., 2017)
		MYPL: opaque beige, circular, large, mucoid, raised, smooth edge
KC1205	Acetobacter aceti lab fly isolate	MRS: opaque beige, circular, medium size, mucoid, raised, smooth edge	(Obadia et al., 2017)
		MYPL: opaque beige, circular, large, mucoid, raised, smooth edge
KC1206	Lactobacillus plantarum (WF) wild fly isolate pCD256-P11-mCherry		(Obadia et al., 2017)
KC1207	Lactobacillus plantarum (WF) wild fly isolate pCD256-P11-pHluorin		This work
KC1208	Acetobacter pasteurianus lab fly (Oregon-R) isolate pCM62-Plac-sfGFP		This work

## Sheet: Supplementary File 1b
Minimum inhibitory concentrations of antibiotics for the four primary members of the fruit fly gut microbiota.
Minimum inhibitory concentrations are expressed in µg/mL ± standard deviation, n=3.
Antibiotic	Class	L. plantarum	L. brevis	A. pasteurianus	A. tropicalis
Ampicillin	Beta-lactam	10.42±3.61	25±0	16.67±7.22	>100
Streptomycin	Aminoglycoside	>50	50±0	12.5±10.83	1.56±0
Chloramphenicol	N/A	7.29±4.77	6.25±0	>50	25±0
Tetracycline	N/A	>50	>50	>50	1.56±0
Erythromycin	Macrolide	0.2±0	0.2±0	>25	>25
Ciprofloxacin	Fluoroquinolone	>50	25±0	>50	12.5±0
Trimethoprim	N/A	>50	>50	>50	>50
Spectinomycin	N/A	200±0	200±0	66.67±28.87	25±0
Rifampin	N/A	1.3±0.45	0.52±0.23	6.25±0	4.17±1.8
Vancomycin	N/A	>100	>100	>100	>100
