# Supplementary figures and images for: Bacterial interspecies interactions modulate pH-mediated antibiotic tolerance
Source: eLife journal article supplement (doi:10.7554/elife.51493), 2020-01-29

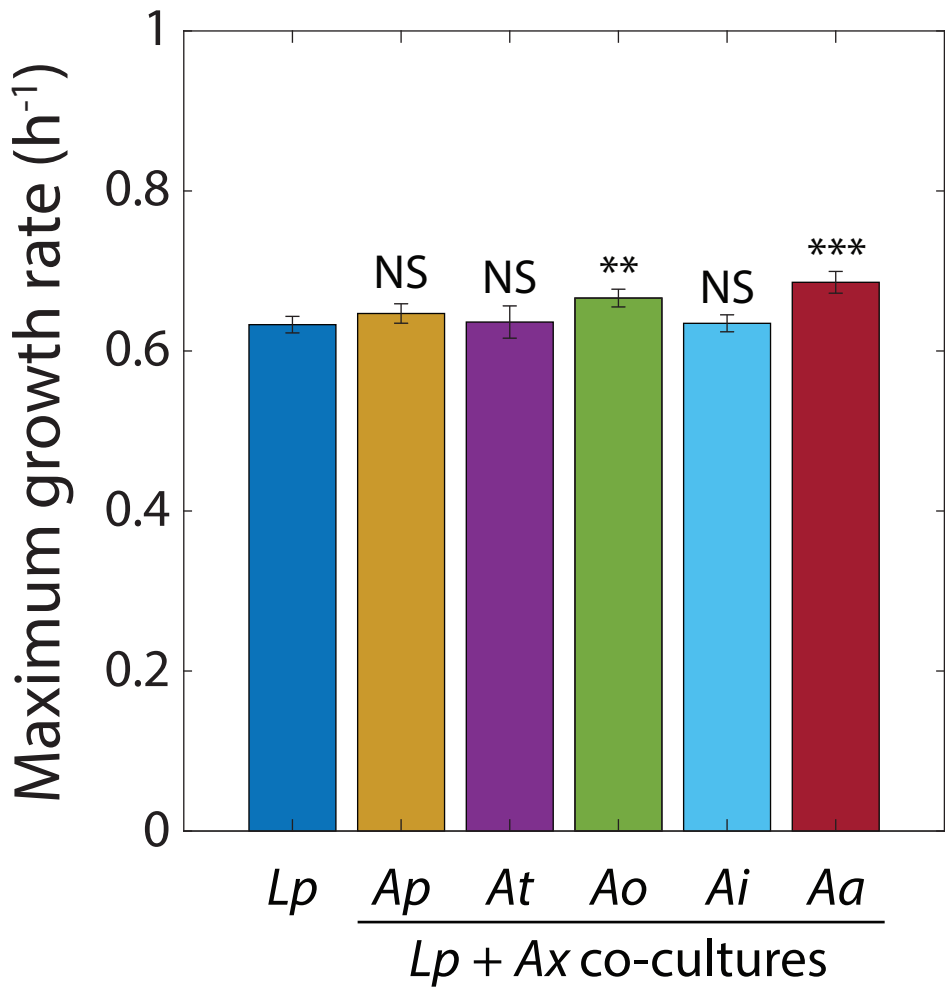

Supplement: supp [file elife-51493-supp-v1.zip]

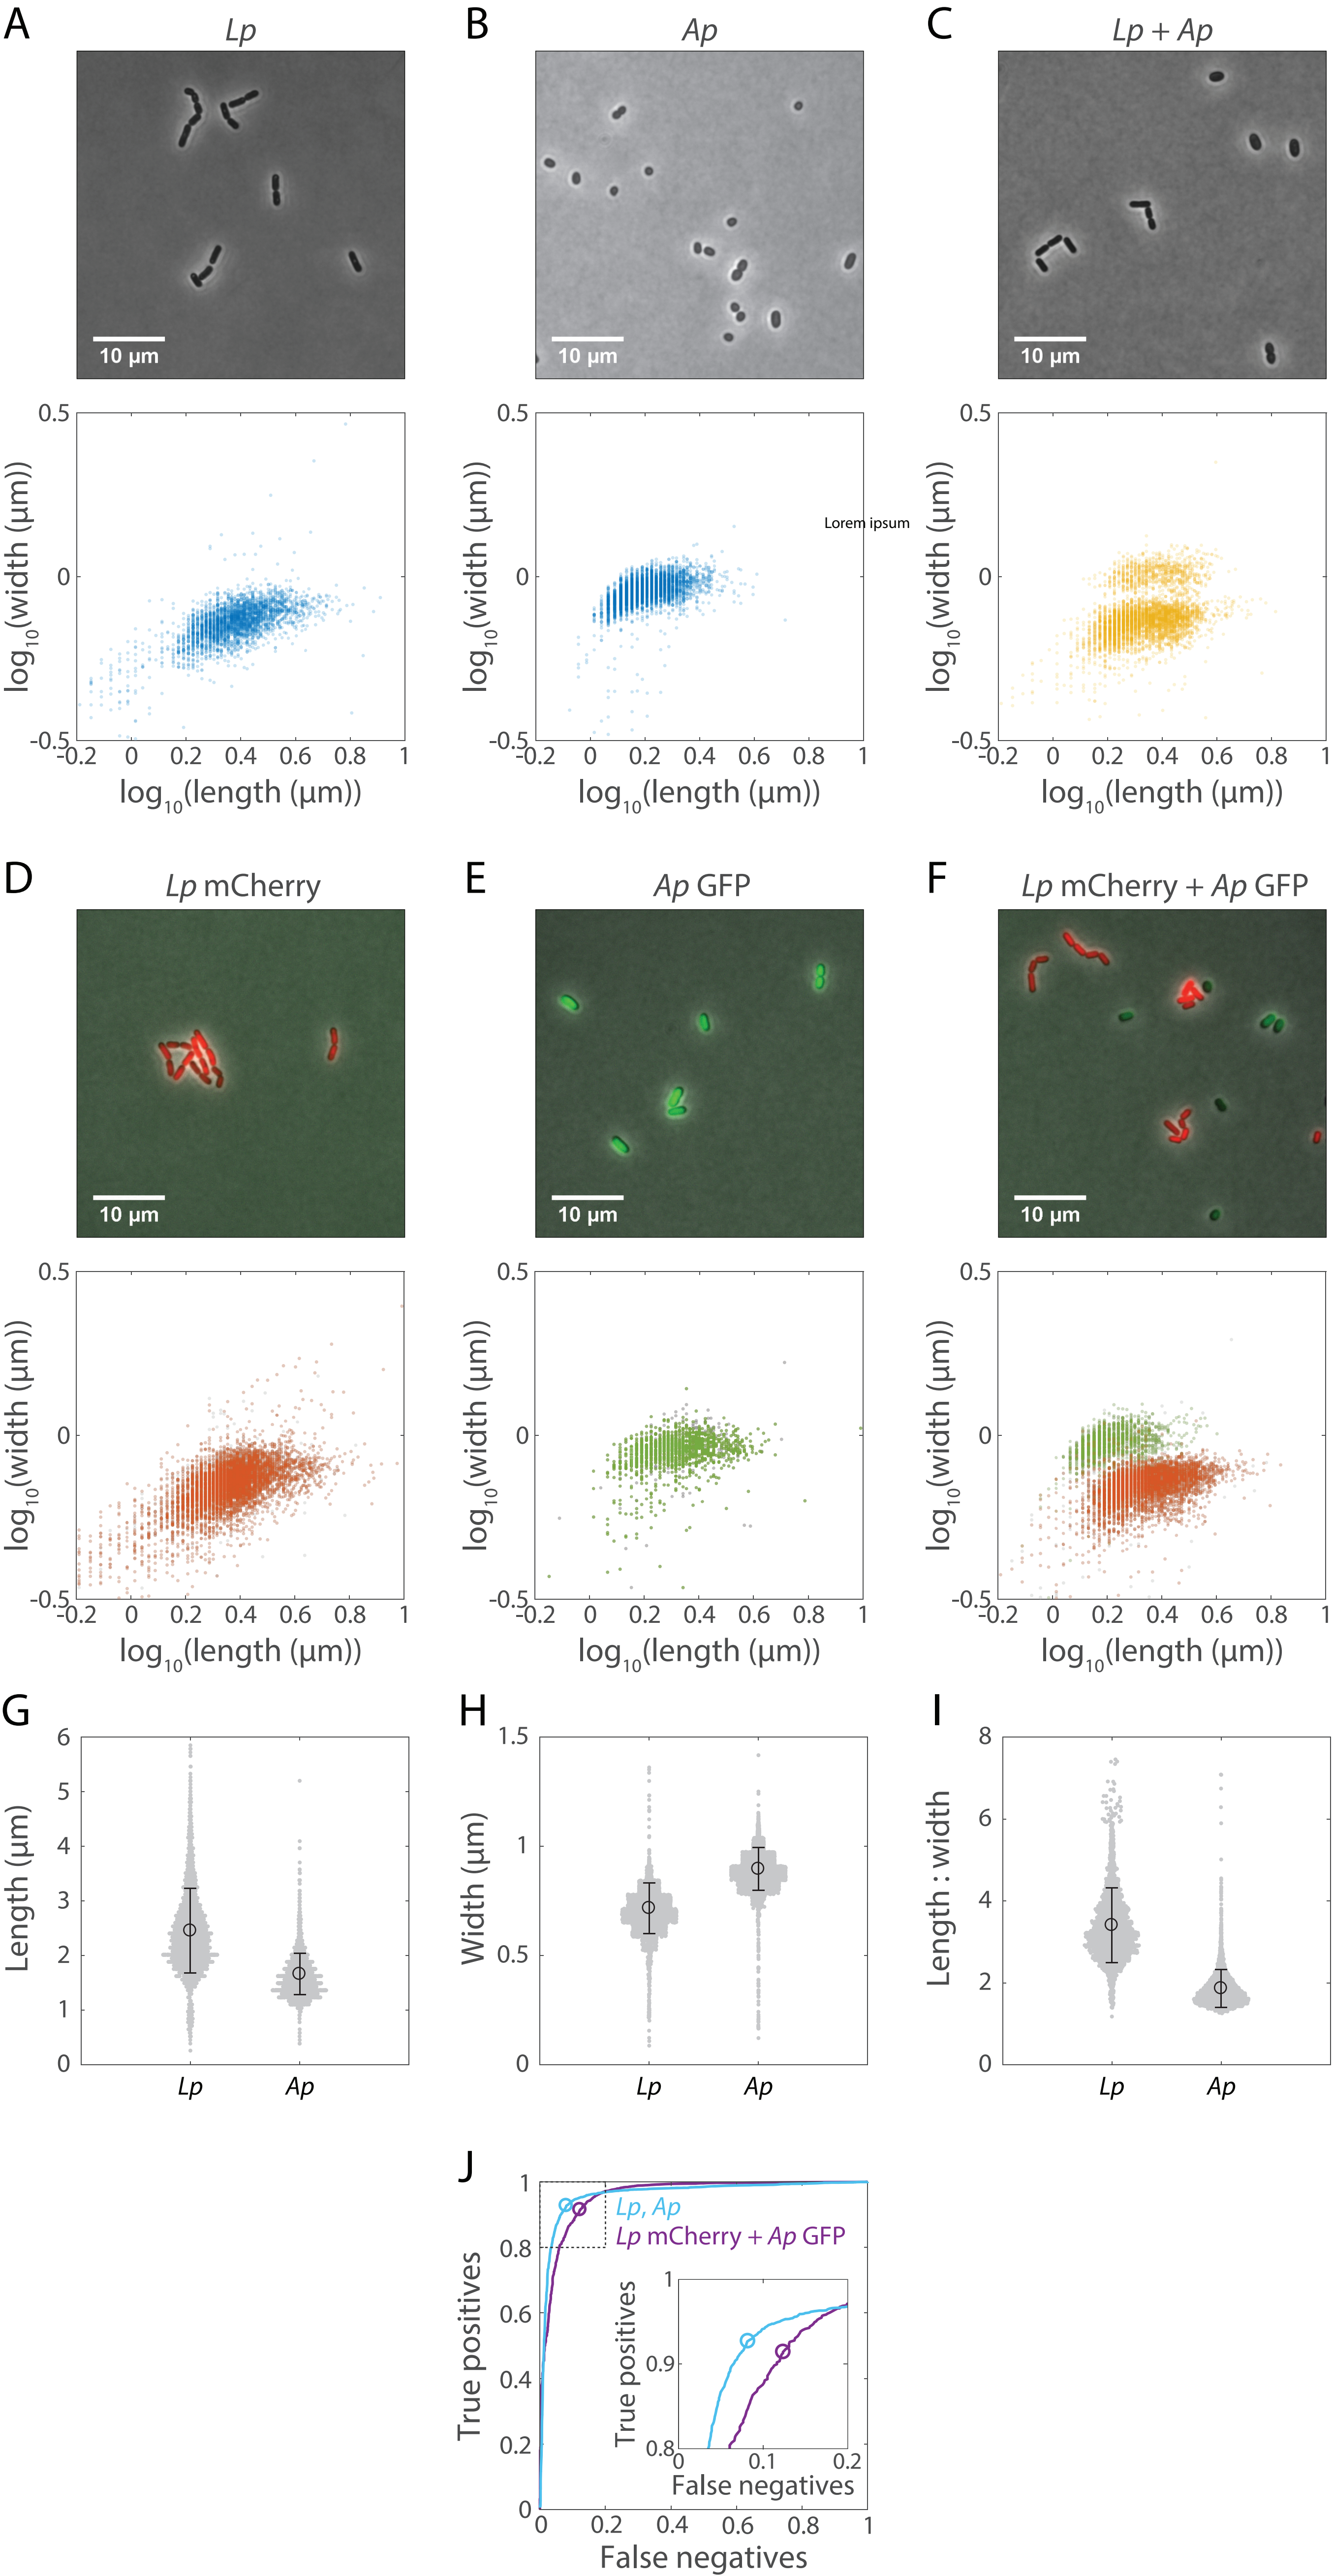

Supplement: supp [file elife-51493-supp-v1.zip]

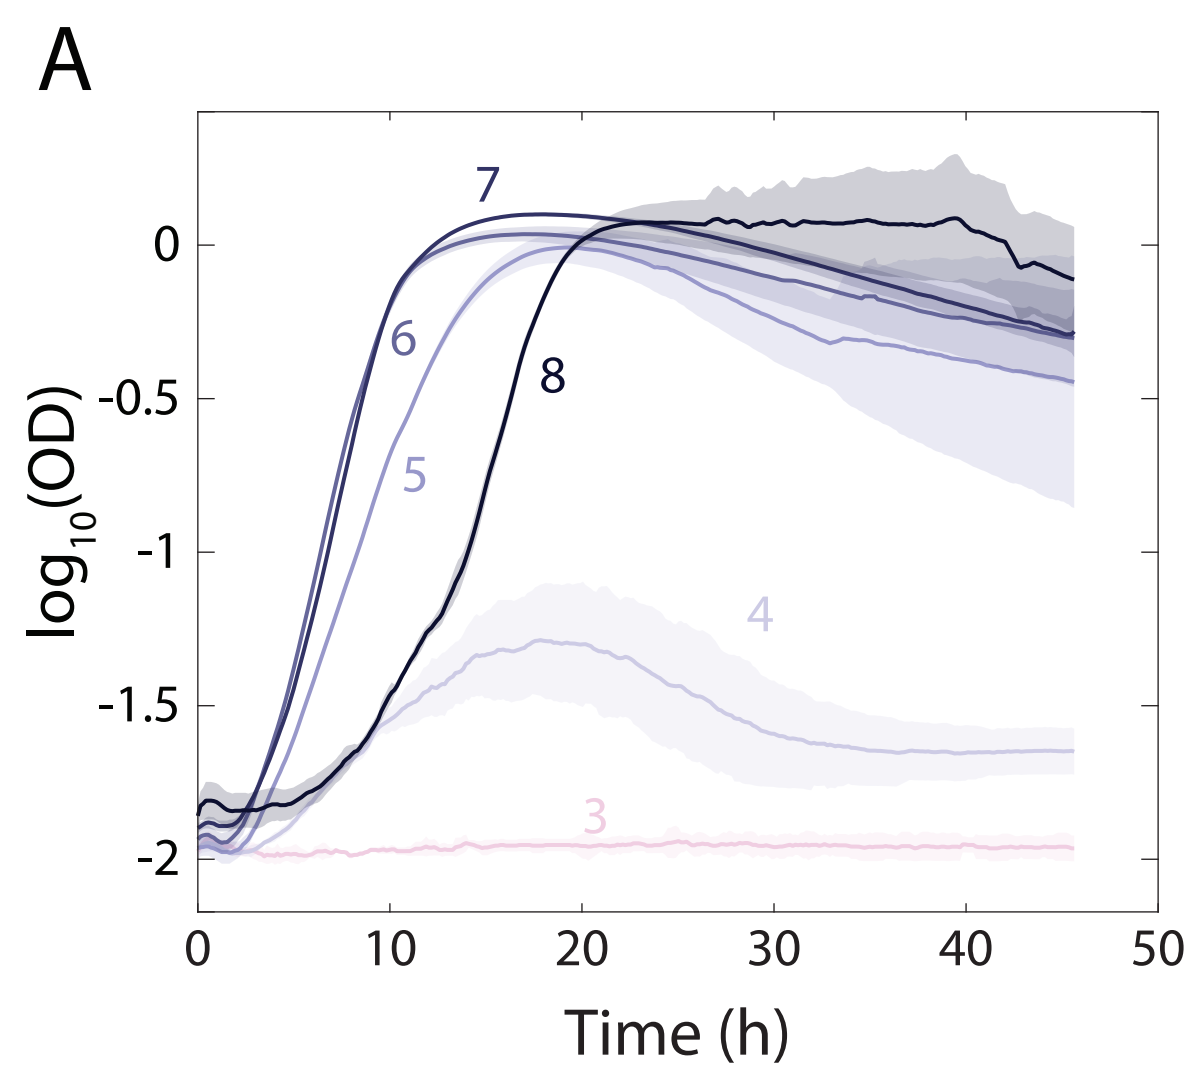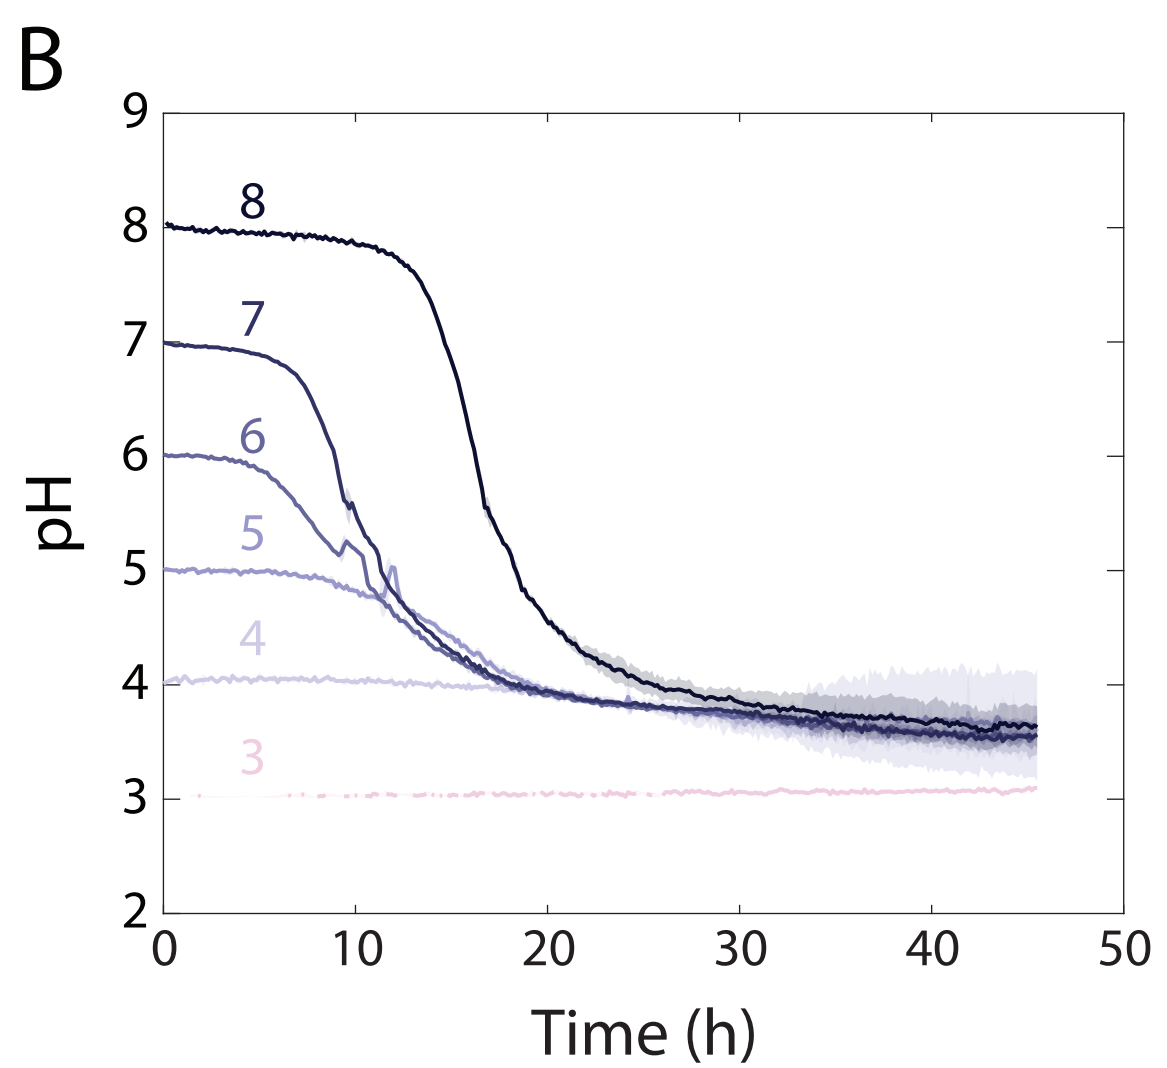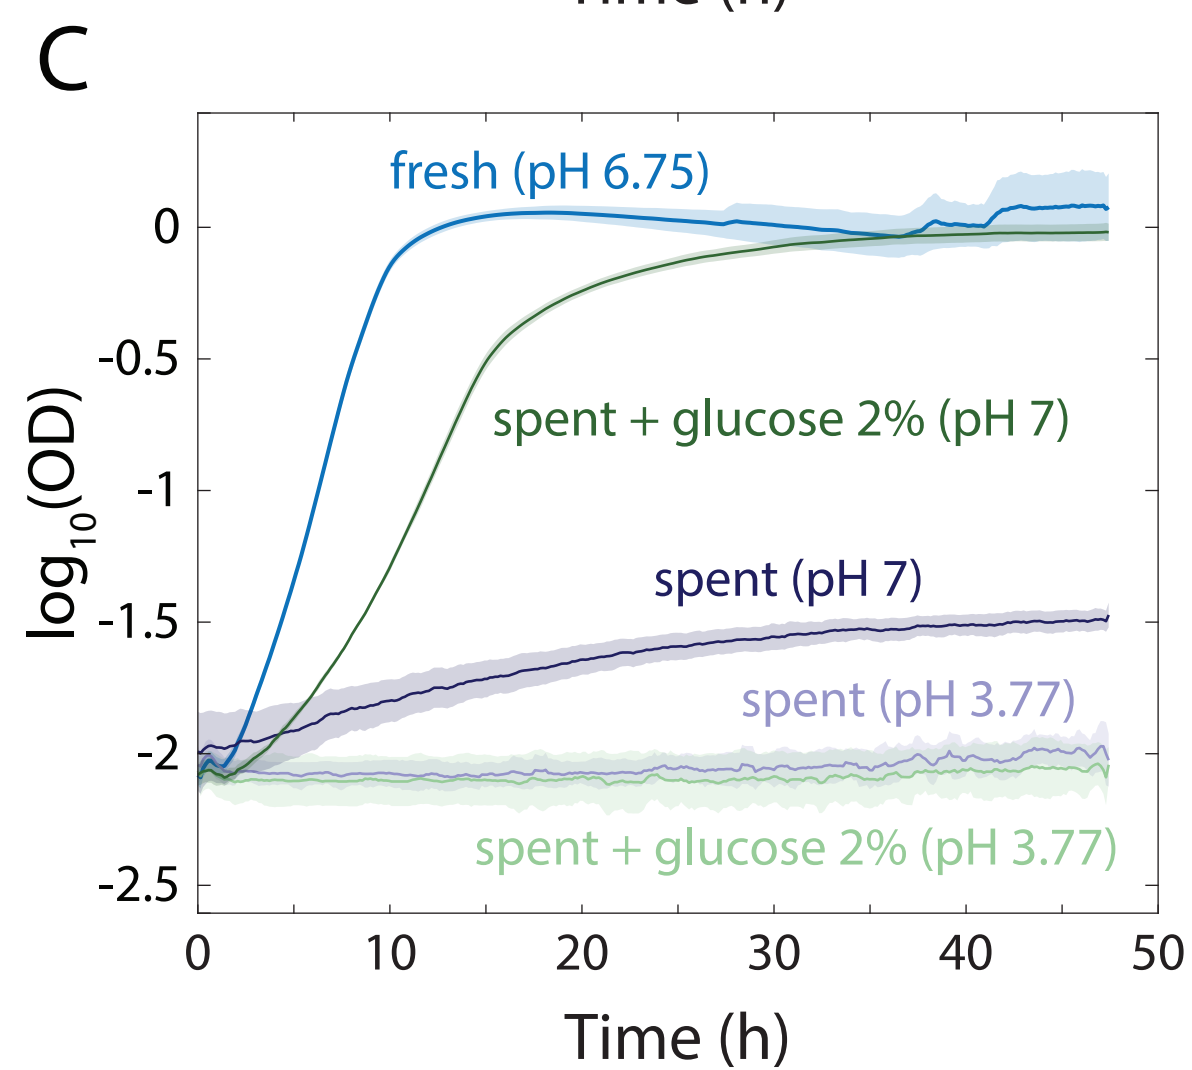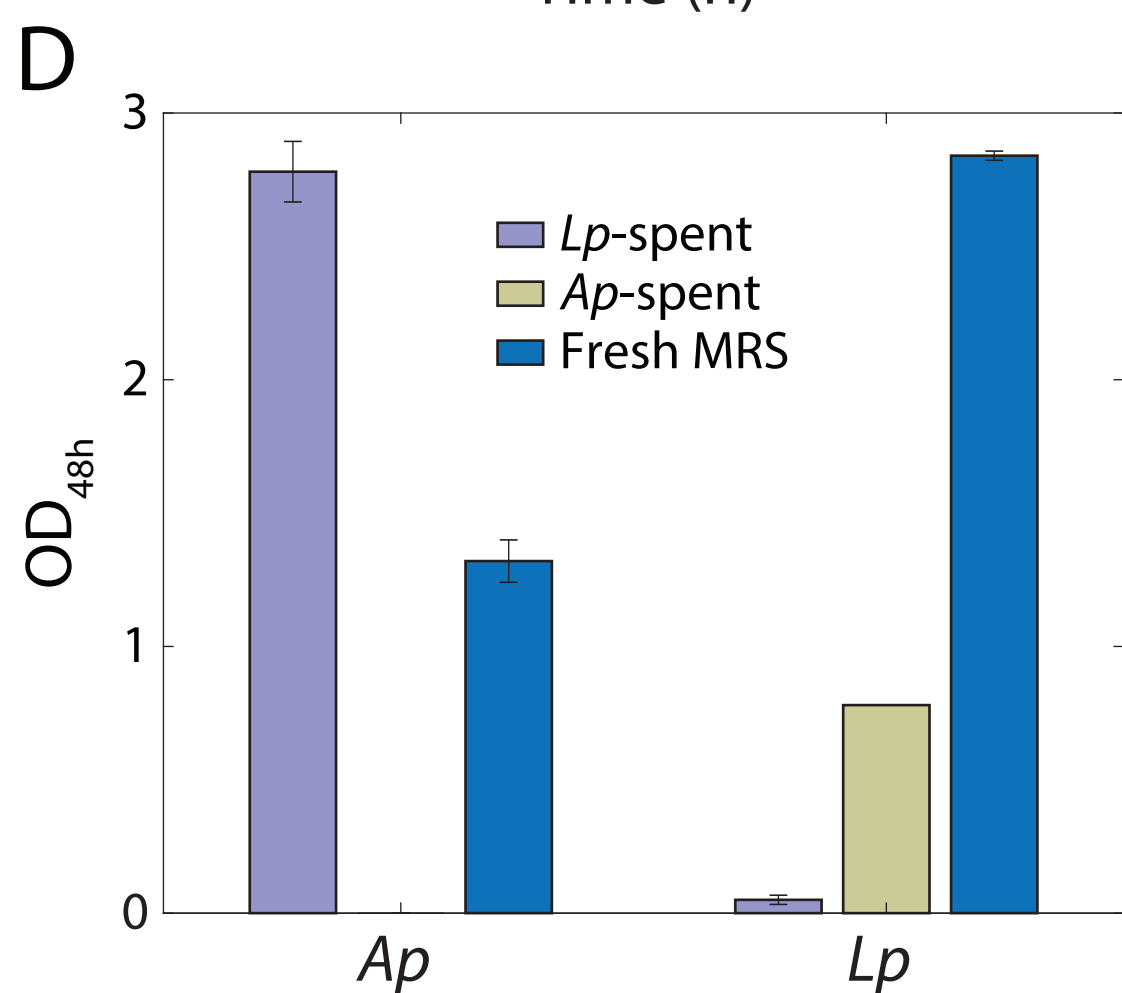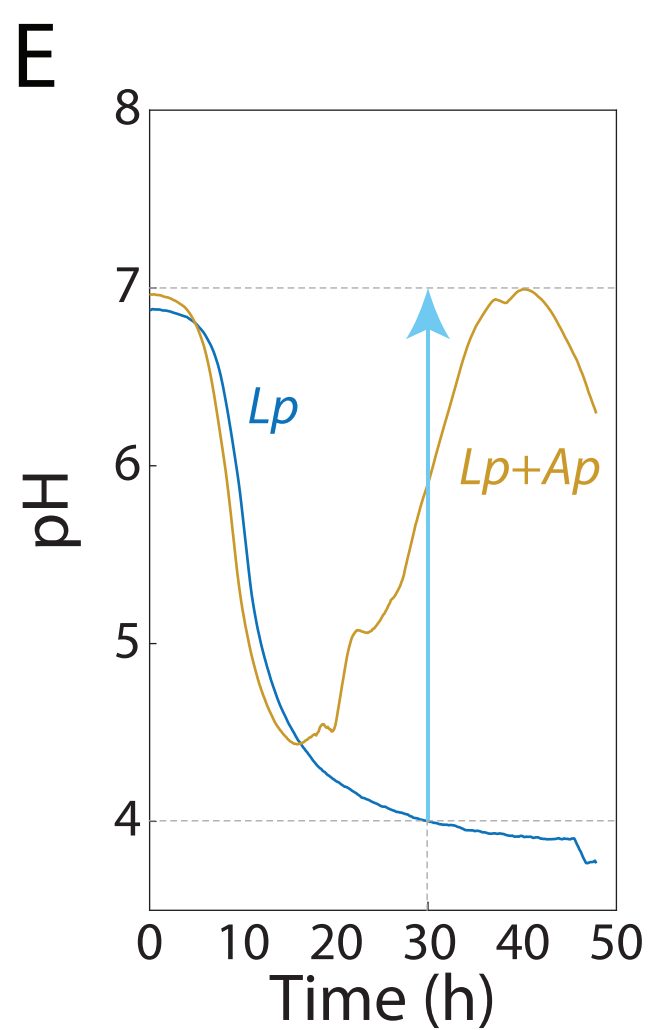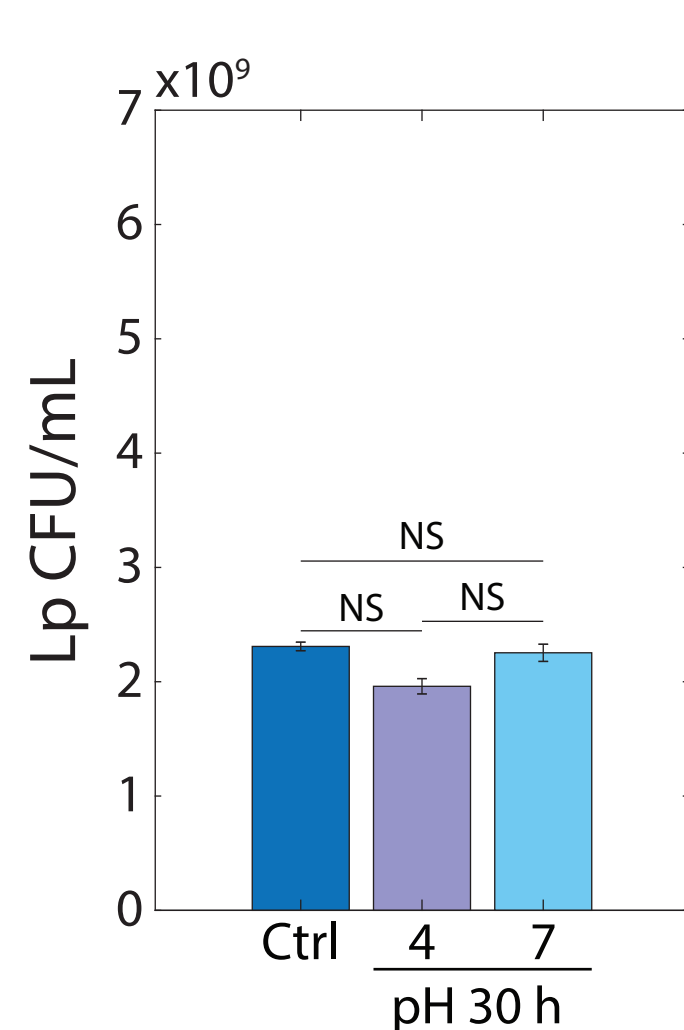

Supplement: supp [file elife-51493-supp-v1.zip]

**A**pHluorin fluorescence  
(a.u., excitation: 475 nm)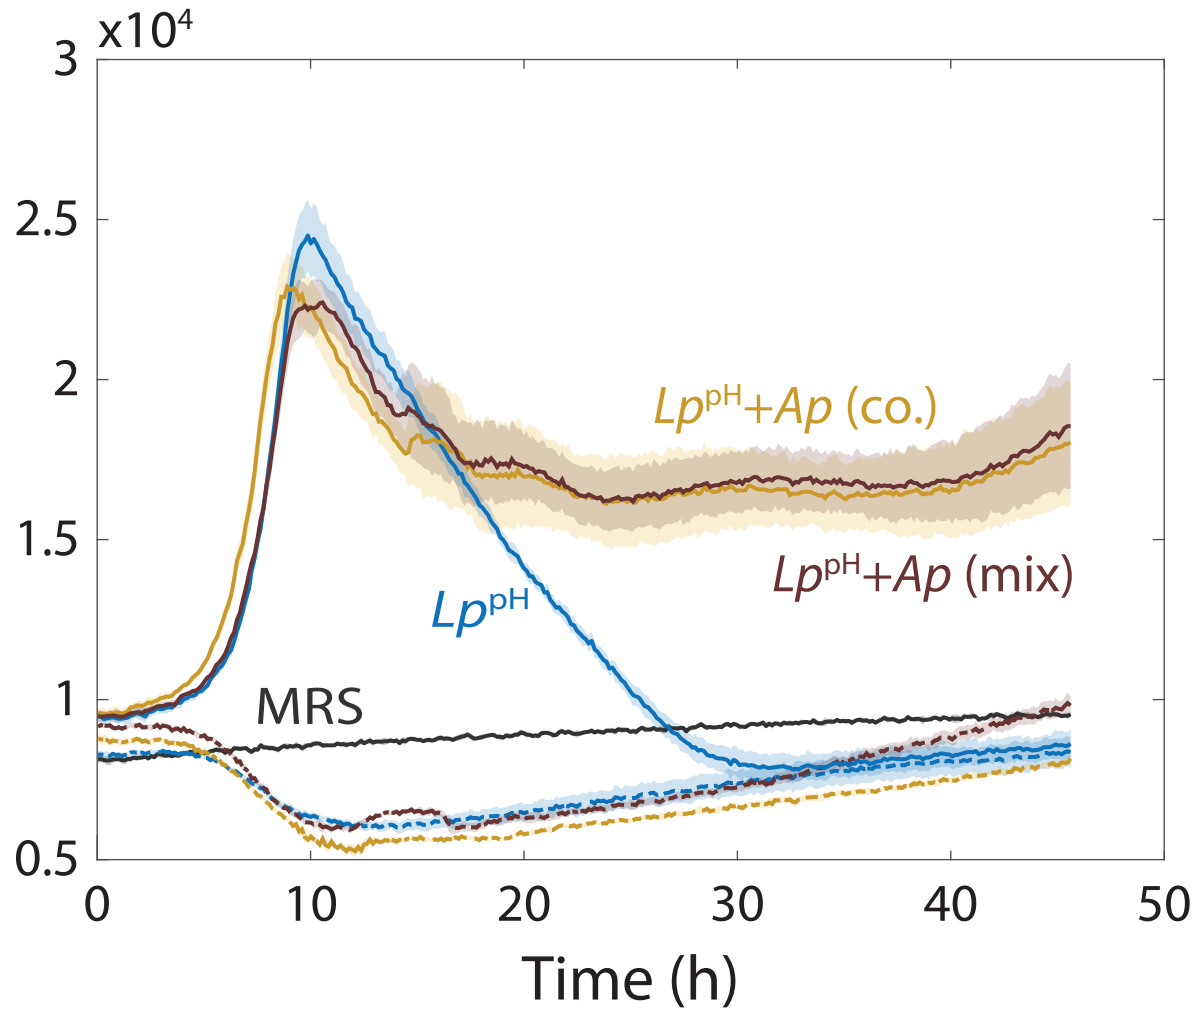**B**

pHluorin signal ratio

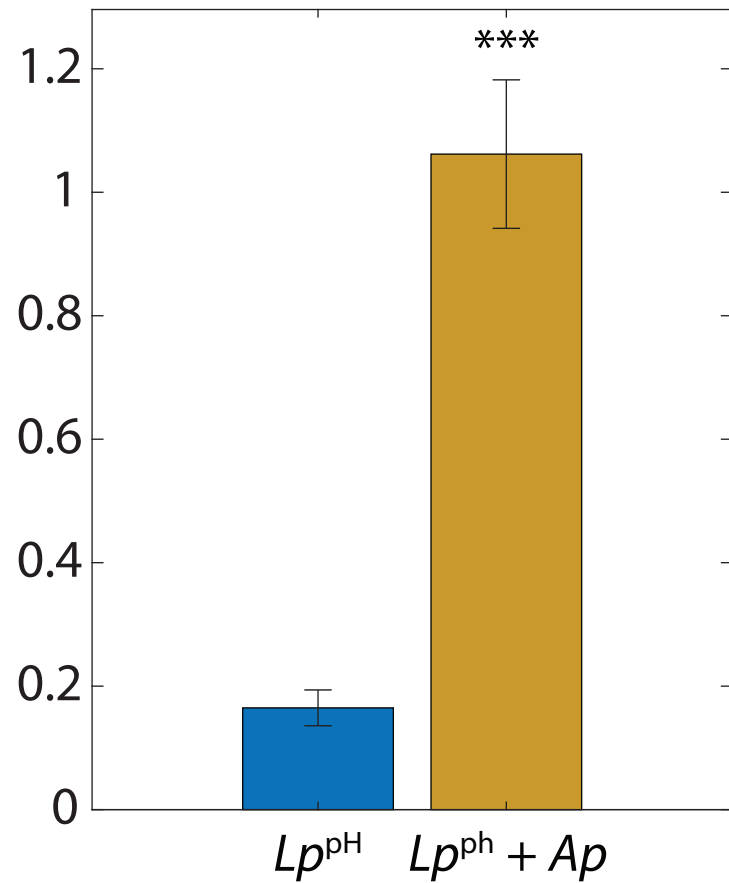

Supplement: supp [file elife-51493-supp-v1.zip › elife_poa_e51493_Figure_2_figure_supplement_4.pdf]

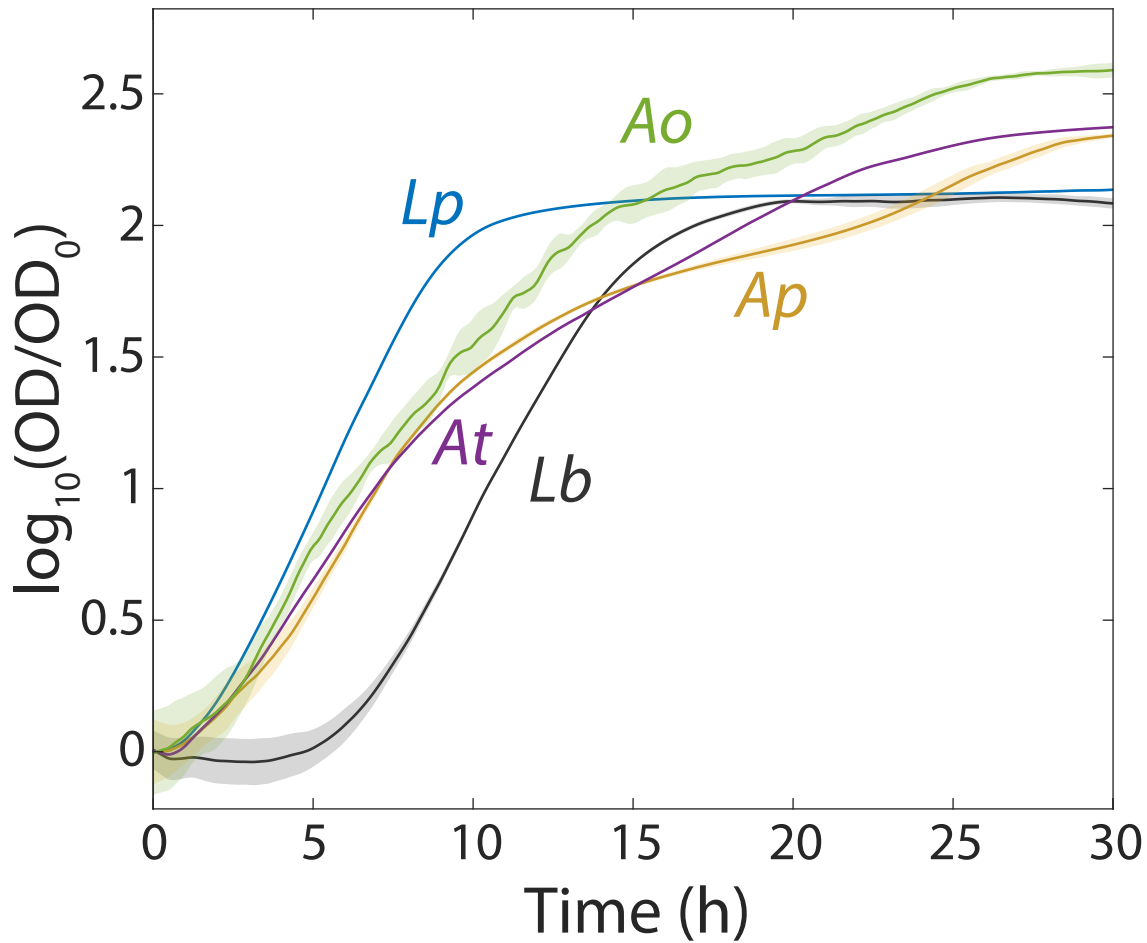

Supplement: supp [file elife-51493-supp-v1.zip › elife_poa_e51493_Figure_1_figure_supplement_1.pdf]

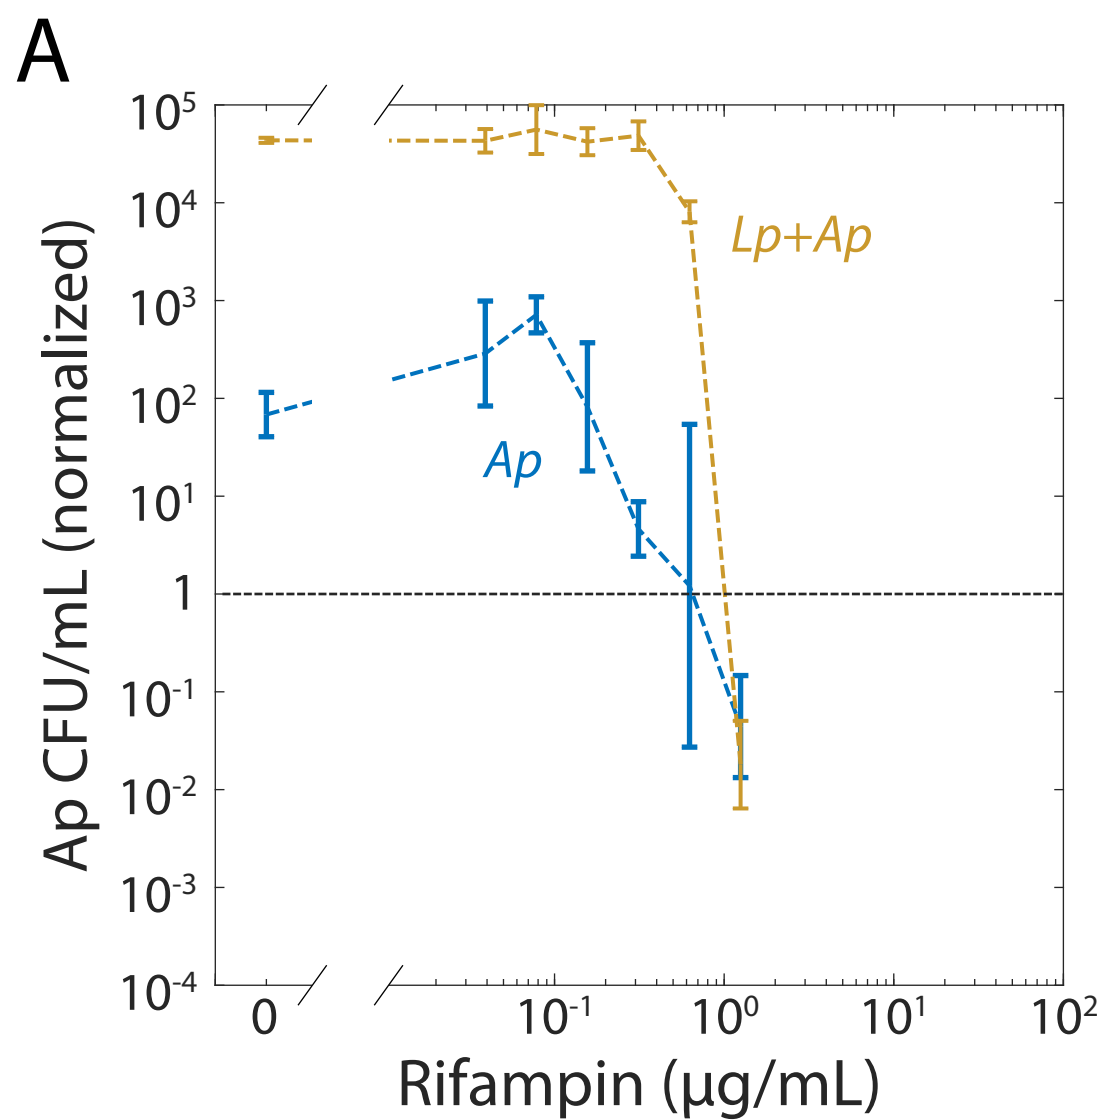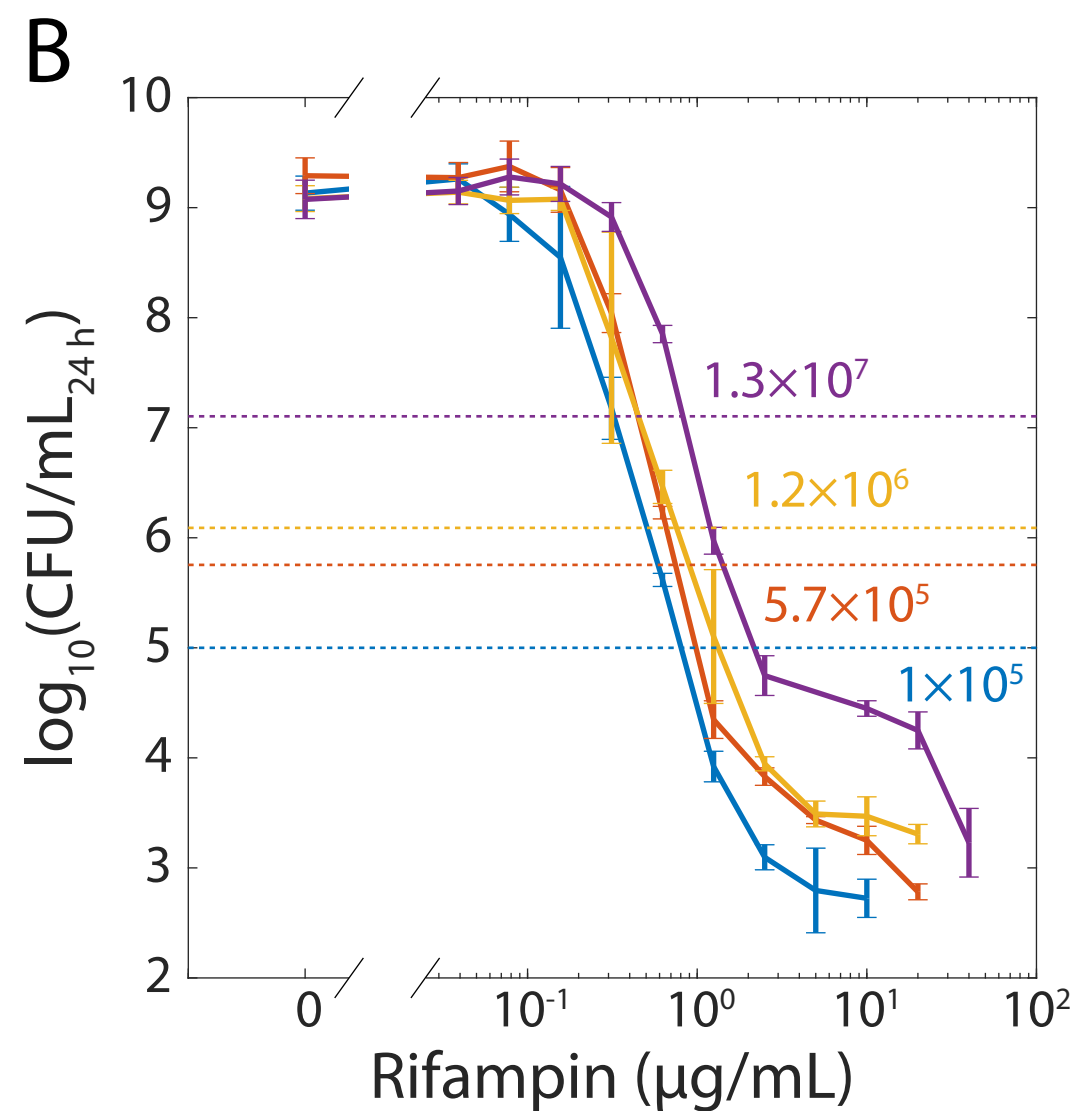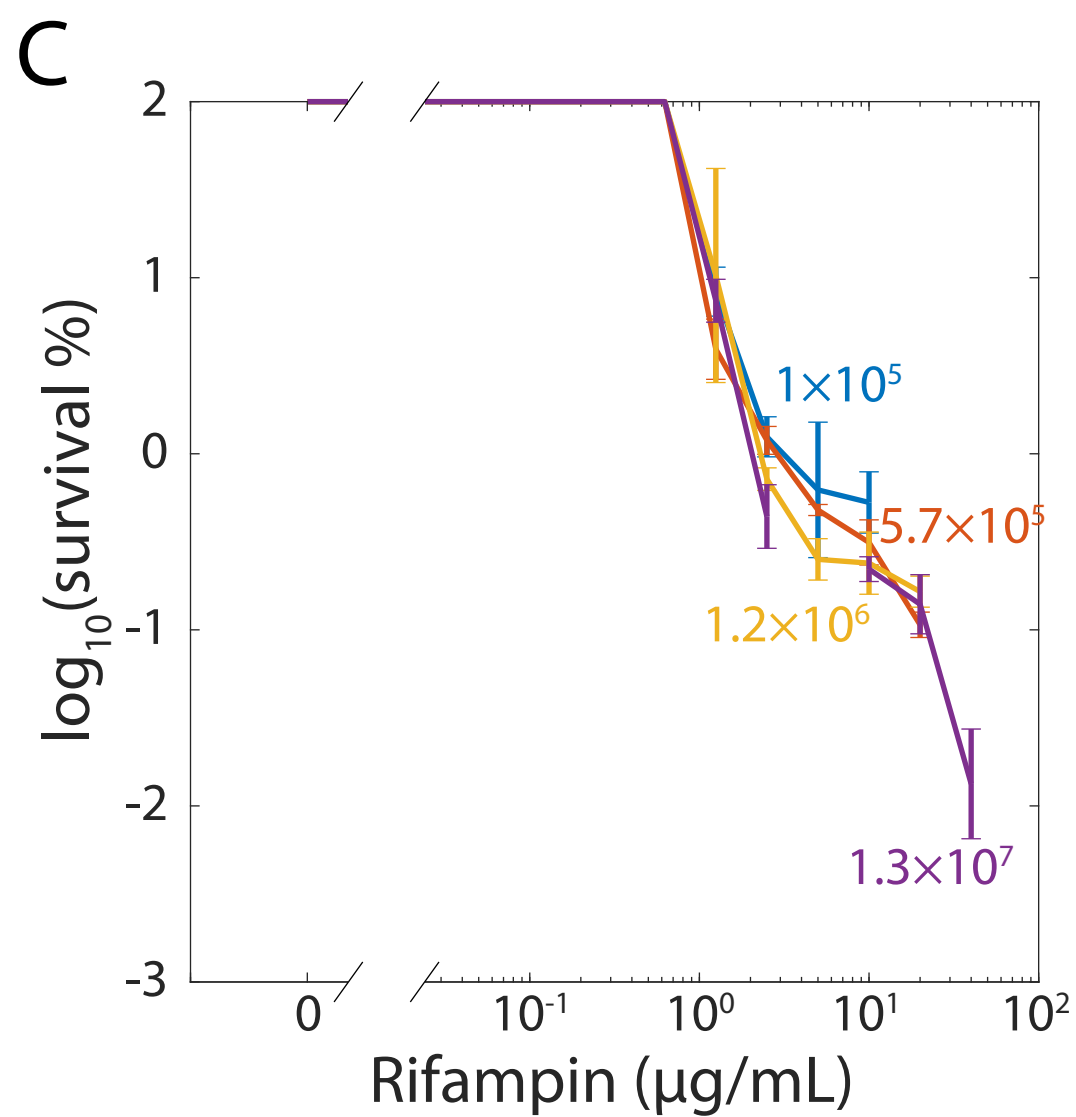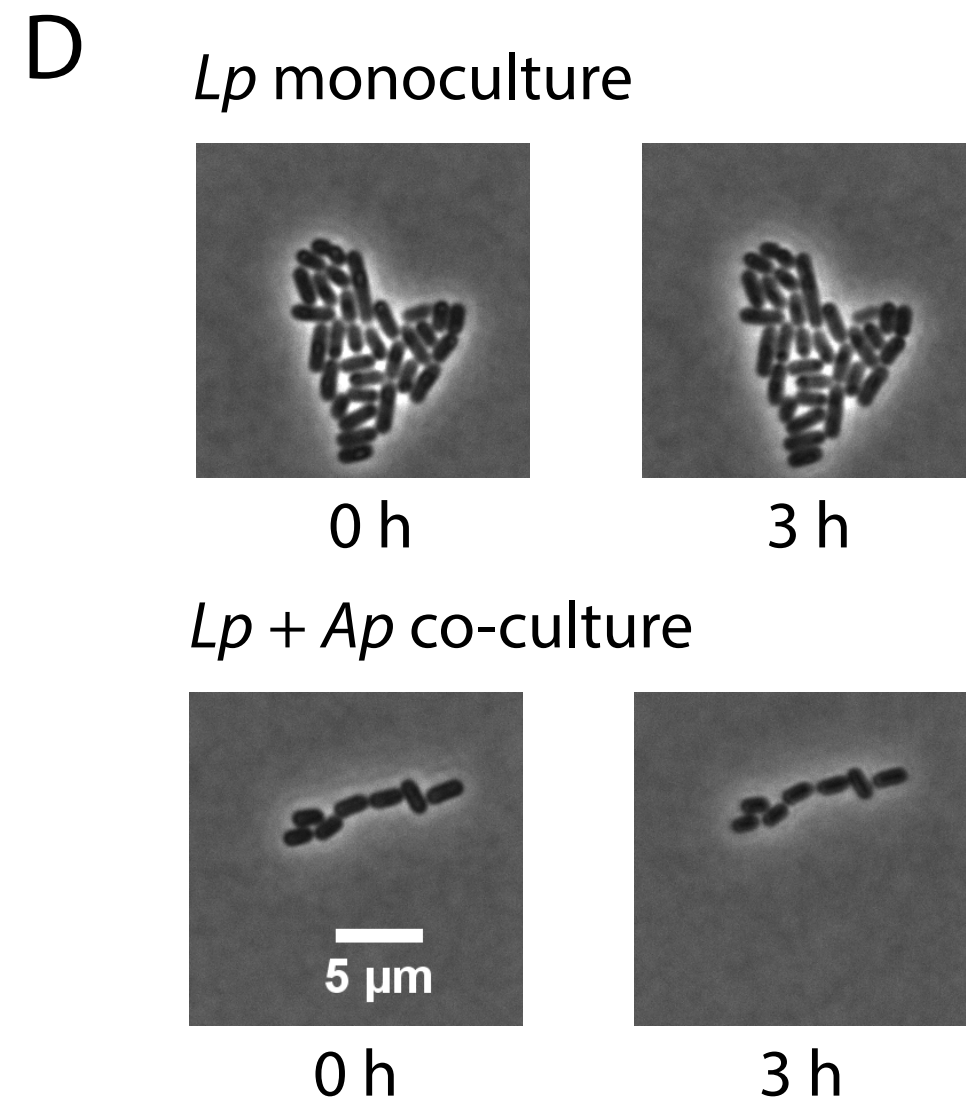

Supplement: supp [file elife-51493-supp-v1.zip › elife_poa_e51493_Figure_1_figure_supplement_2.pdf]

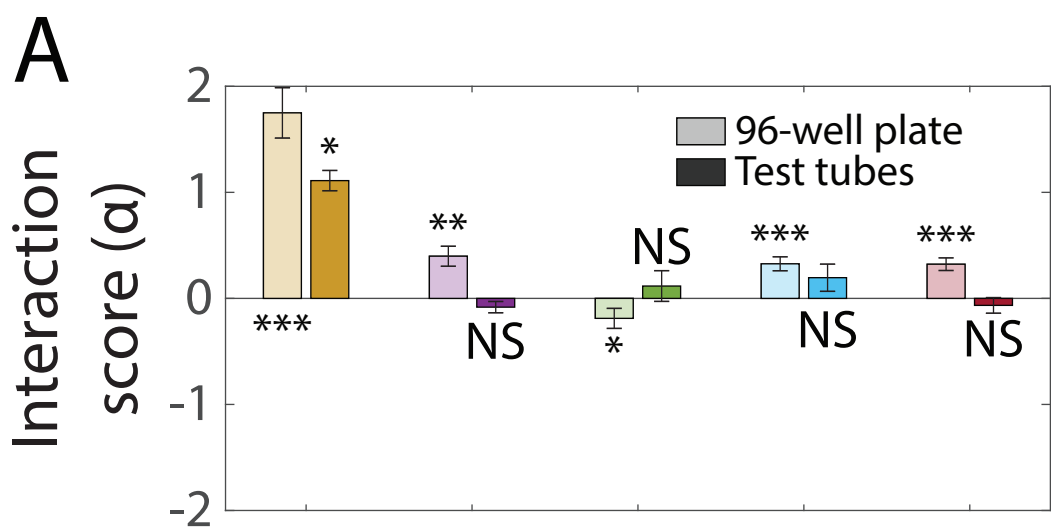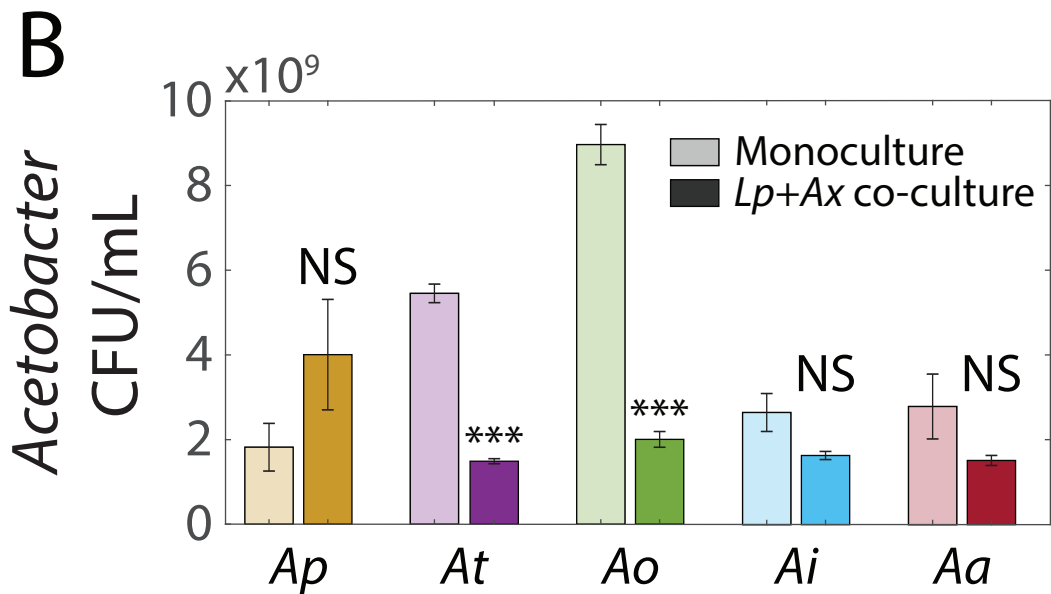

Supplement: supp [file elife-51493-supp-v1.zip › elife_poa_e51493_Figure_2_figure_supplement_1.pdf]

**A**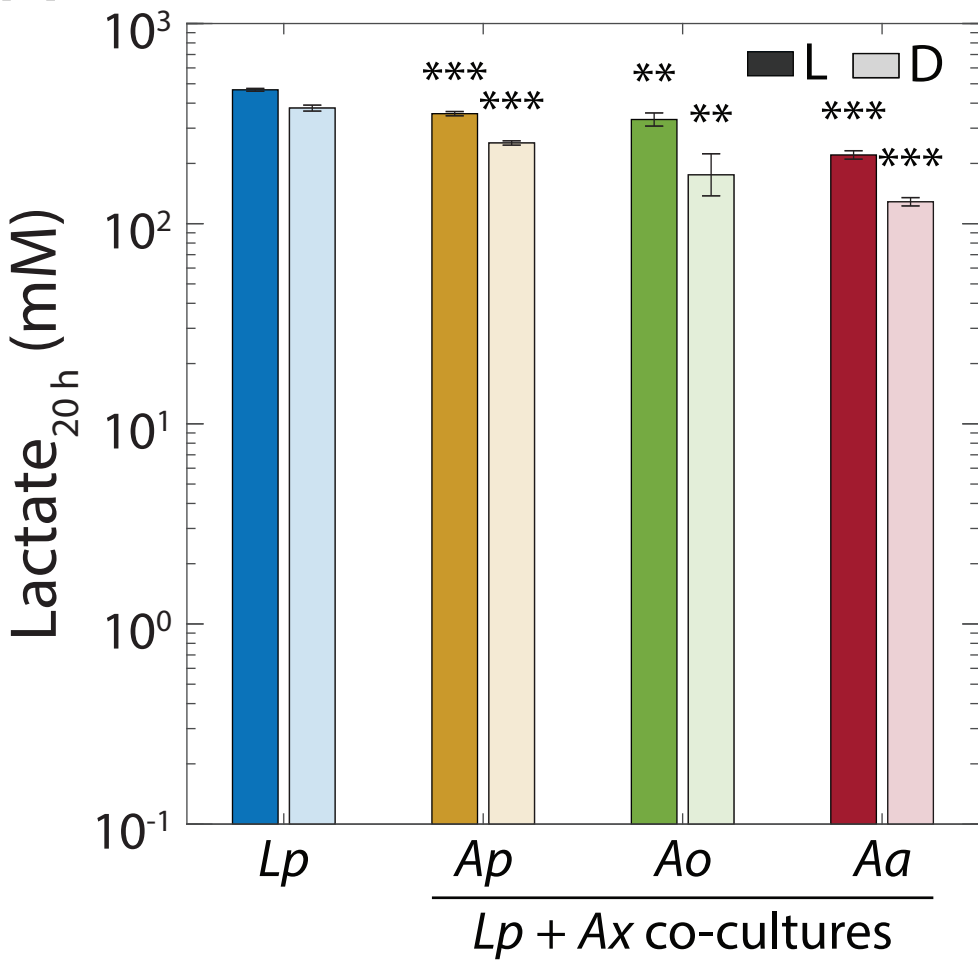**B**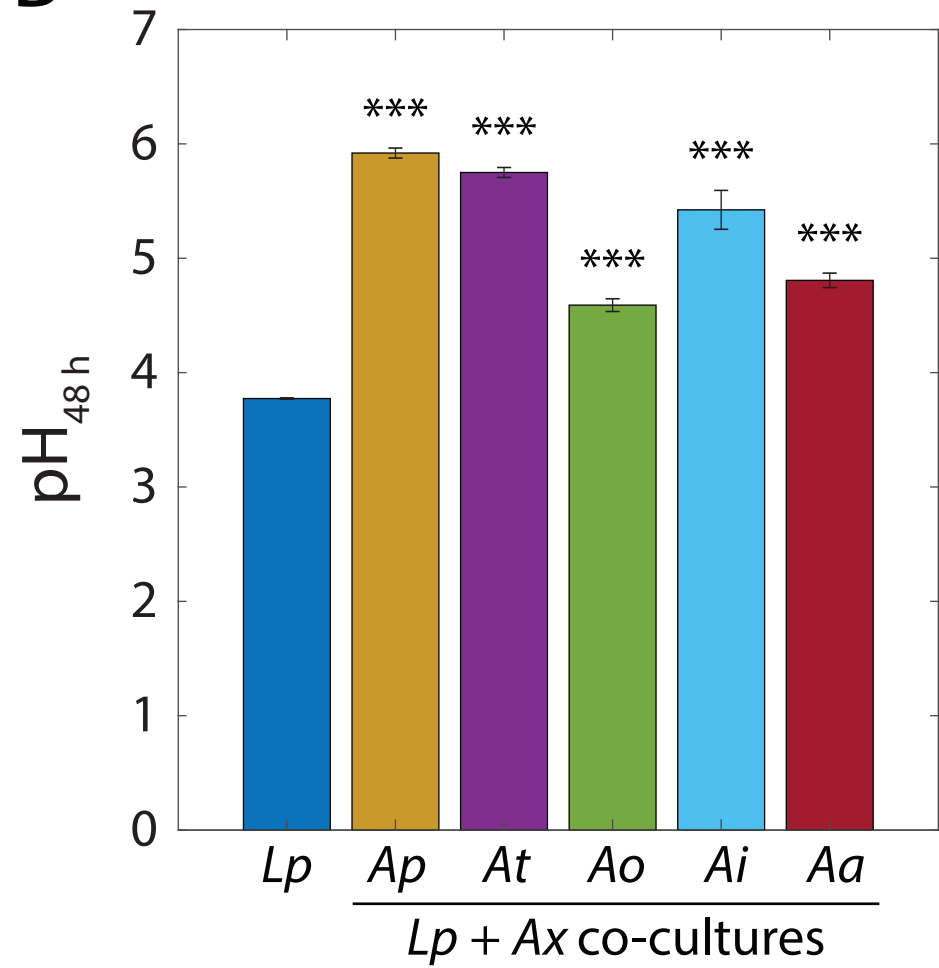

Supplement: supp [file elife-51493-supp-v1.zip › elife_poa_e51493_Figure_2_figure_supplement_2.pdf]
